# Supplementary material for: Black bean (Phaseolus vulgaris L. cv. “Tolosa”) polyphenolic composition through cooking and in vitro digestion
Source: Royal Society of Chemistry journal article supplement (doi:10.1039/d4fo01238k), 2024-01-01

Supplementary material

Supplementary Figure 1: Map with the distribution of the different “Tolosa” beans farms  
(adapted from <https://sigpac.mapama.gob.es/feqa/visor/>)

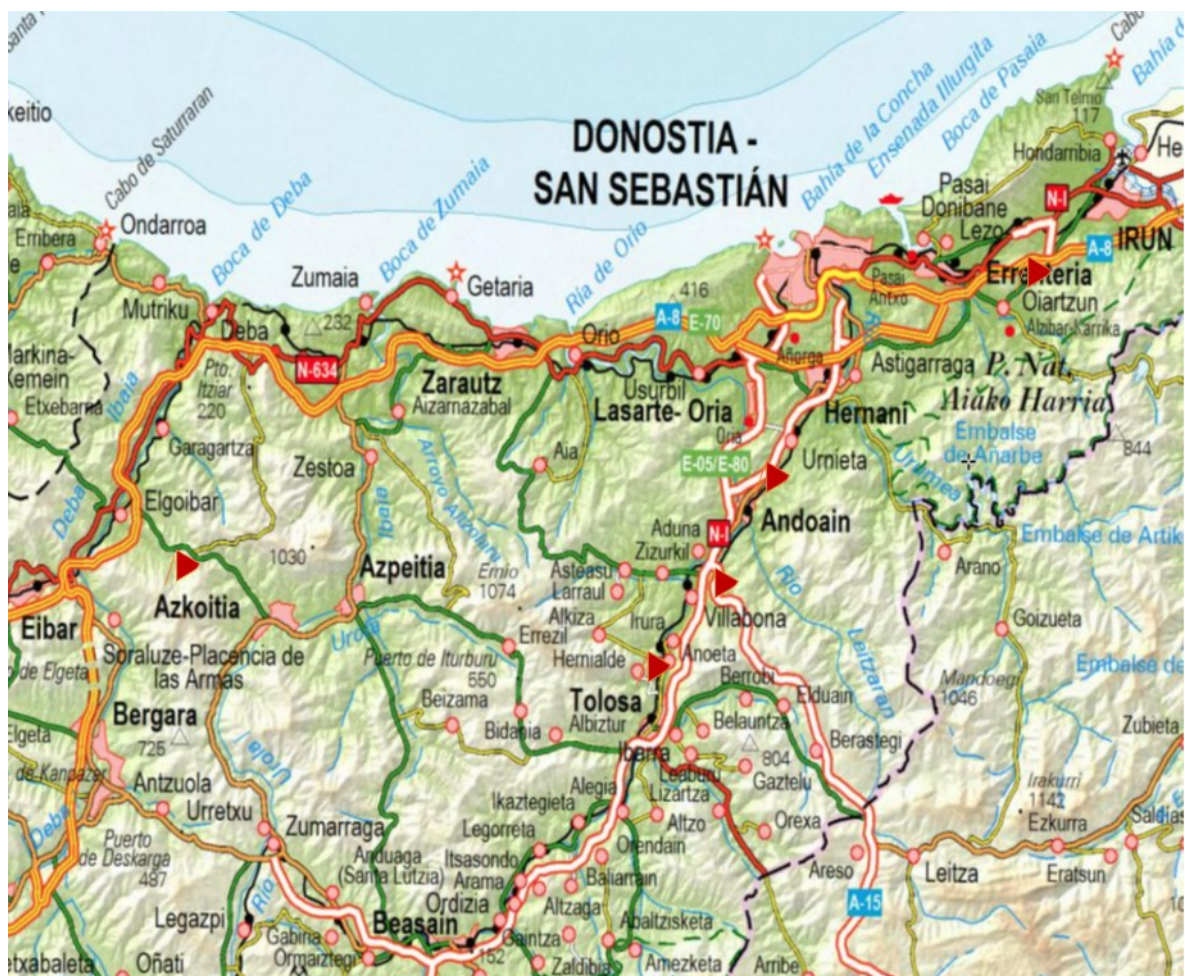

Supplement: d4fo01238k1.pdf [file d4fo01238k1.pdf]
